# Supplementary material
Source: Springer Nature journal article supplement (https://www.springermedizin.de/resource/supplementary/12887_2010_383_MOESM1_ESM.pdf/9474984)
Supplement: MOESM1 [file 9474984]

**Assessed for Eligibility (N=86)**

**Excluded (N=25)**

Hb<5g/dL=4  
Creatinine >250 $\mu$ mol/L=1  
Died before consent=1  
Known cardiac disease=1  
Consent declined=17

**Randomisation Phase (N=61)**

**HSD/5% Dextrose (n=26)**

Severe diarrhoea (n =19)  
Non Severe diarrhoea (n =7)

**Ringer's Lactate (n=29)**

Severe diarrhoea (n =21)  
Non Severe diarrhoea (n =8)

**4.5% Albumin (n=6)**

All with non-severe  
diarrhoea

**No withdrawals**

All followed up intensively  
up to 48 hours and  
thereafter for in-hospital  
survival outcome

**No withdrawals**

All followed up intensively  
up to 48 hours and  
thereafter for in-hospital  
survival outcome

**No withdrawals**

All followed up intensively  
up to 48 hours and  
thereafter for in-hospital  
survival outcome
